# Supplementary material
Source: publisher figshare collection journal article supplement (https://acs.figshare.com/ndownloader/files/12810803)
Supplement: Supplementary file 1 [file 12810803]

**Supplementary Information of**  
**Retention of U(VI) by the Formation of Fe Precipitates from**  
**Oxidation of Fe(II)**

Huiyang Mei,<sup>†,‡</sup> Xiaoli Tan,<sup>†,‡,\*</sup> Liqiang Tan,<sup>†</sup> Yuedong Meng,<sup>‡</sup> Changlun Chen,<sup>‡</sup>

Ming Fang,<sup>†,\*</sup> Xiangke Wang<sup>†,§</sup>

<sup>†</sup> School of Environment and Chemical Engineering, North China Electric Power University, Beijing 102206, P. R. China

<sup>‡</sup> CAS Key Laboratory of Photovoltaic and Energy Conservation Materials, Institute of Plasma Physics, Chinese Academy of Sciences, P.O. Box 1126, Hefei, 230031, P. R. China

<sup>§</sup> Collaborative Innovation Center of Radiation Medicine of Jiangsu Higher Education Institutions, Suzhou, Jiangsu, P. R. China

\* Corresponding author Email: [tanxl@ipp.ac.cn](mailto:tanxl@ipp.ac.cn) or [xltan@ncepu.edu.cn](mailto:xltan@ncepu.edu.cn) (X. Tan);  
[mfang@ncepu.edu.cn](mailto:mfang@ncepu.edu.cn) (M. Fang)

## 1. Measurement of fluorescence spectra.

The excitation-emission matrix data were recorded under room temperature after the precipitates were put into a 1 cm quartz sample holder. The scan speed was set at 1200 nm/min and both of the emission and excitation wavelength range were set from 200 to 600 nm by 5 nm steps. Both of the excitation and emission slit band widths were set as 10 nm.

Table S1. A systematic comparison on the experimental conditions and results of this work with those of the previous studies.

| Fe(II)<br>(mM) | pH  | Temperature         | Aging<br>time<br>(h) | NaHCO <sub>3</sub><br>(mM) | Phase(s)      |               | Ref.          |
|----------------|-----|---------------------|----------------------|----------------------------|---------------|---------------|---------------|
|                |     |                     |                      |                            | Dominant      | Minor         |               |
| 50             | 6.5 | 25°C                | 48                   | 100                        | goethite      | lepidocrocite | 1             |
| 50             | 5.5 | Room<br>temperature | 48                   | 1000                       | goethite      | lepidocrocite | 2             |
| 1.0            | 7.0 | Room<br>temperature | 5                    | 8                          | lepidocrocite | goethite      | 3             |
| 0.54           | 7.0 | Room<br>temperature | 4-5                  | 8                          | lepidocrocite | goethite      | 4             |
| 1.0            | 7.0 | Room<br>temperature | 24                   | 8                          | lepidocrocite | goethite      | This<br>study |

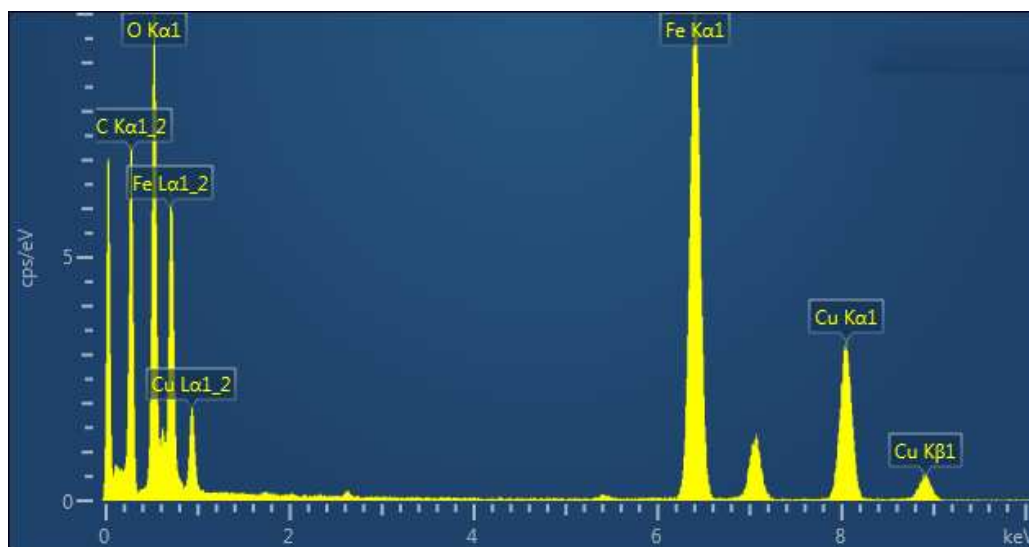

Figure S1. EDS spectrum of Fe-U0.10<sub>ads</sub> after successive washing process.

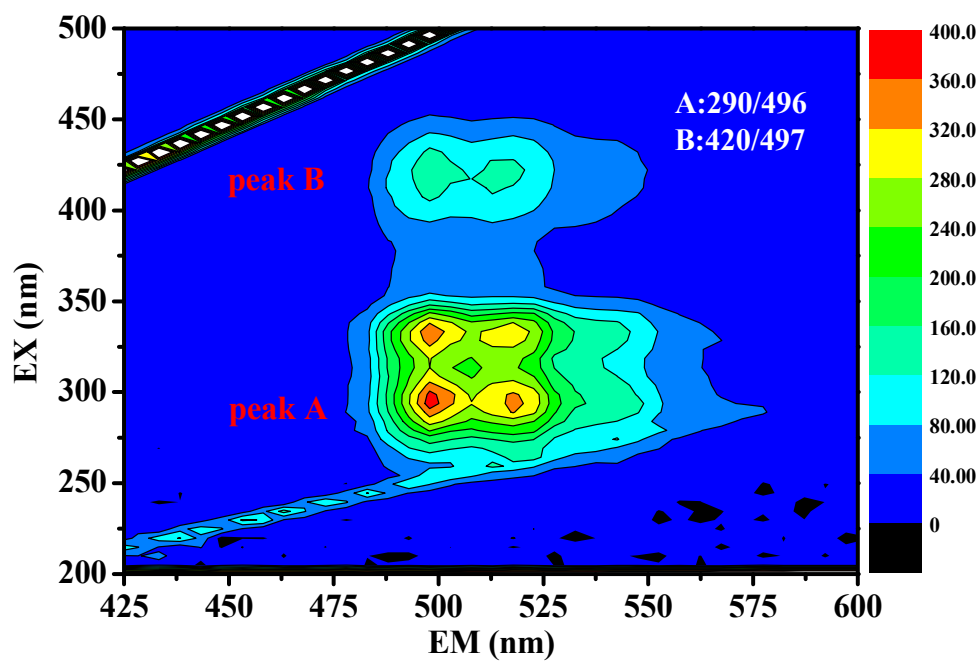

Figure S2. Fluorescence excitation-emission matrix spectrum of uranyl solution.

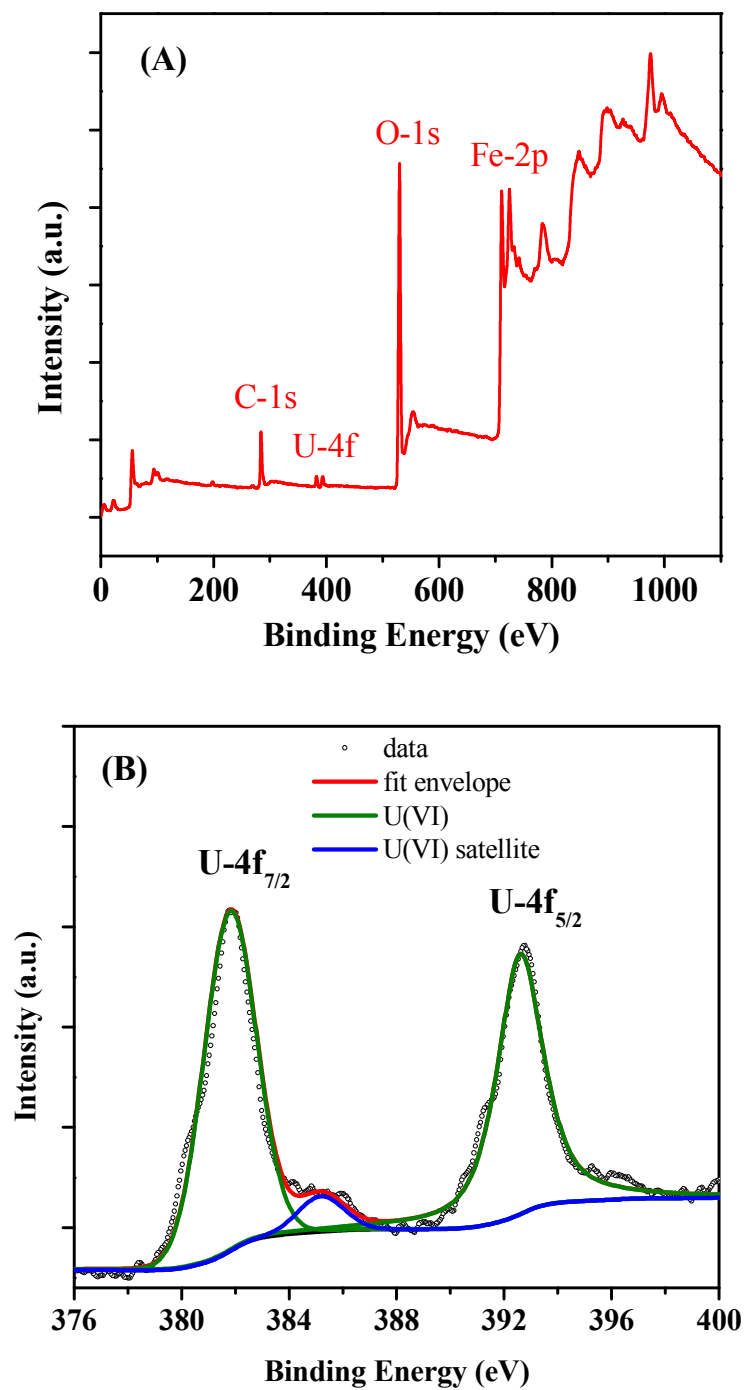

Figure S3. XPS survey spectrum of the adsorption sample Fe-U0.10<sub>ads</sub> (A) and corresponding U 4f spectrum (B).

## REFERENCES

- (1) Doornbusch, B.; Bunney, K.; Gan, B.; Jones, F.; Gräfe, M., Iron oxide formation from  $\text{FeCl}_2$  solutions in the presence of uranyl ( $\text{UO}_2^{2+}$ ) cations and carbonate rich media. *Geochim. Cosmochim. Acta* **2015**, *158*, 22-47.
- (2) Cumplido, J.; Barrón, V.; Torrent, J., Effect of phosphate on the formation of nanophase lepidocrocite from Fe(II) sulfate. *Clay. Clay Miner.* **2000**, *48*, (5), 503-510.
- (3) Voegelin, A.; Senn, A.; Kaegi, R.; Hug, S.; Mangold, S., Dynamic Fe-precipitate formation induced by Fe(II) oxidation in aerated phosphate-containing water. *Geochim. Cosmochim. Acta* **2013**, *117*, 216-231.
- (4) Voegelin, A.; Kaegi, R.; Frommer, J.; Vantelon, D.; Hug, S., Effect of phosphate, silicate, and Ca on Fe(III)-precipitates formed in aerated Fe(II)- and As(III)-containing water studied by X-ray absorption spectroscopy. *Geochim. Cosmochim. Acta* **2010**, *74*, (1), 164-186.
